# Supplementary material for: Multi-dimensional collaboration promotes the catalytic performance of 1D MoO3 nanorods decorated with 2D NiS nanosheets for efficient water splitting
Source: Royal Society of Chemistry journal article supplement (doi:10.1039/d0nr05250g), 2020-01-01
Supplement: d0nr05250g1.pdf [file d0nr05250g1.pdf]

**Multi-dimensional collaboration promotes the catalytic performance  
of 1D MoO<sub>3</sub> nanorods decorated with 2D NiS nanosheets for efficient  
water splitting**

LiuJun Jin, Hui Xu, Cheng Wang, Yong Wang \*, Hongyuan Shang and Yukou Du \*

*College of Chemistry, Chemical Engineering and Materials Science, Soochow  
University, Suzhou 215123, PR China*

\* Corresponding authors: Tel: 86-512-65880089, Fax: 86-512-65880089;

E-mail: yowang@suda.edu.cn (Y. Wang); duyk@suda.edu.cn (Y. Du)

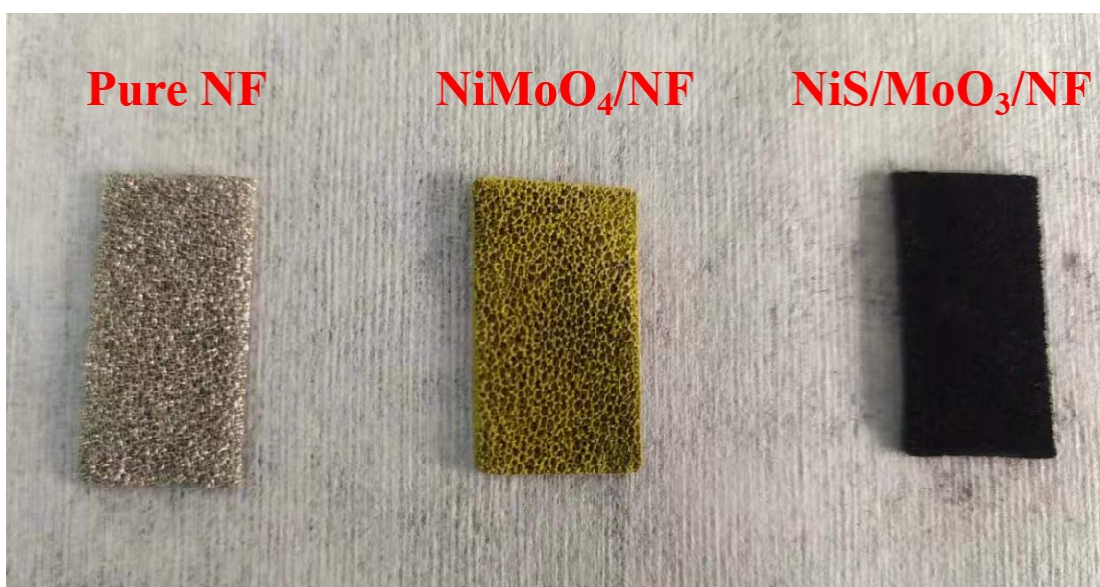

Fig. S1 Optical pictures of NF (gray), NiMoO<sub>4</sub>/NF (yellow) and NiS/MoO<sub>3</sub>/NF (black).

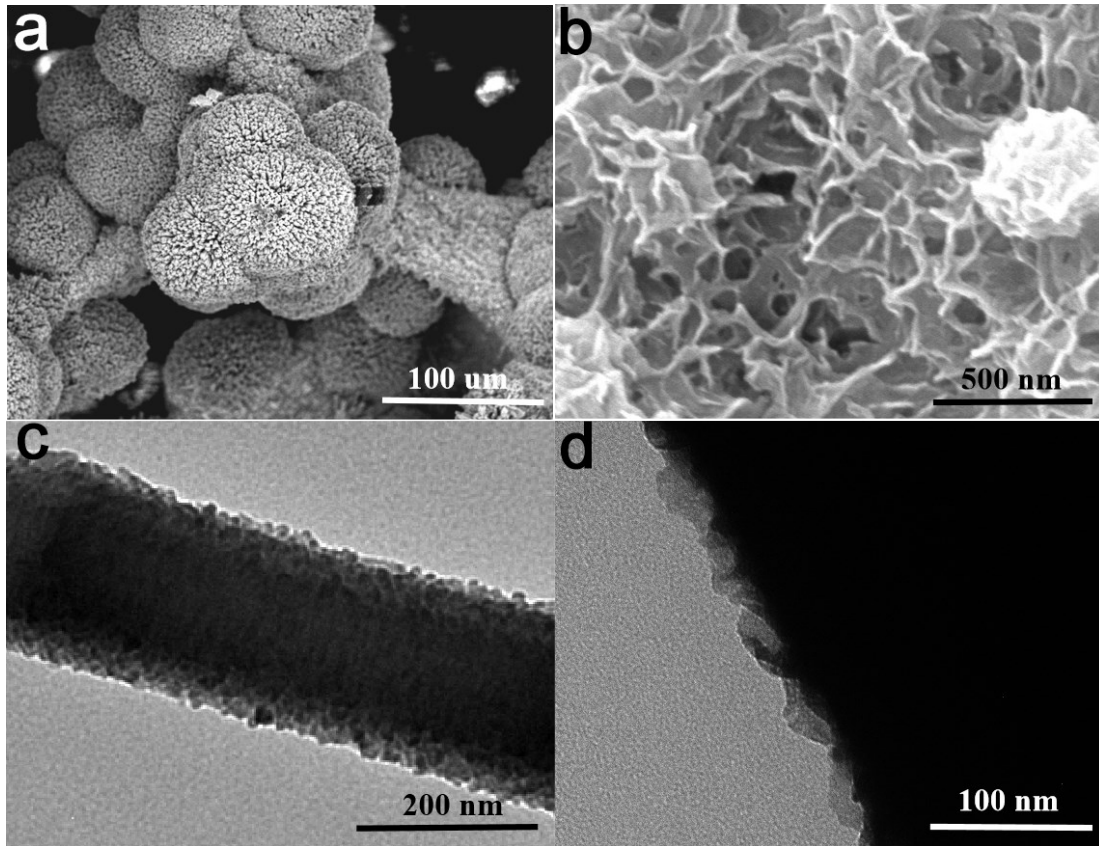

Fig. S2 More detailed SEM images (a, b) and TEM images (c, d) of NiS/MoO<sub>3</sub>/NF with different magnifications.

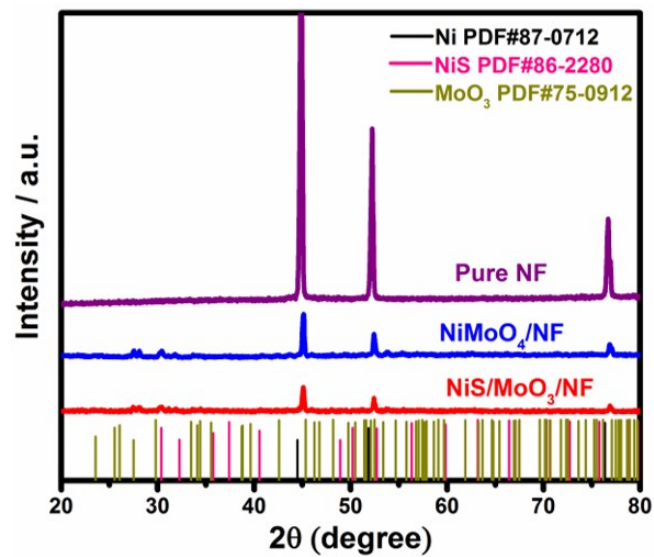

Fig. S3 XRD patterns of NiS/MoO<sub>3</sub>/NF, NiMoO<sub>4</sub>/NF and NF.

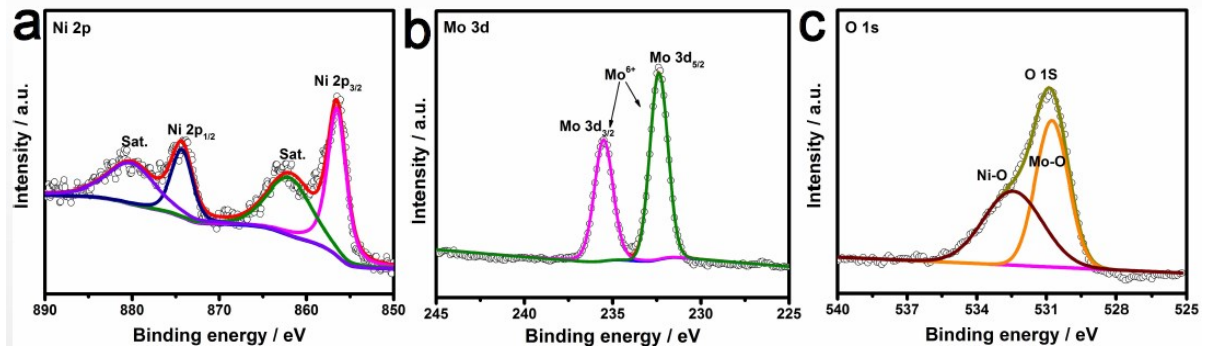

Fig. S4 High-resolution X-ray photoelectron spectra of Ni 2p (a), Mo 3d (b) and O 1s (c)

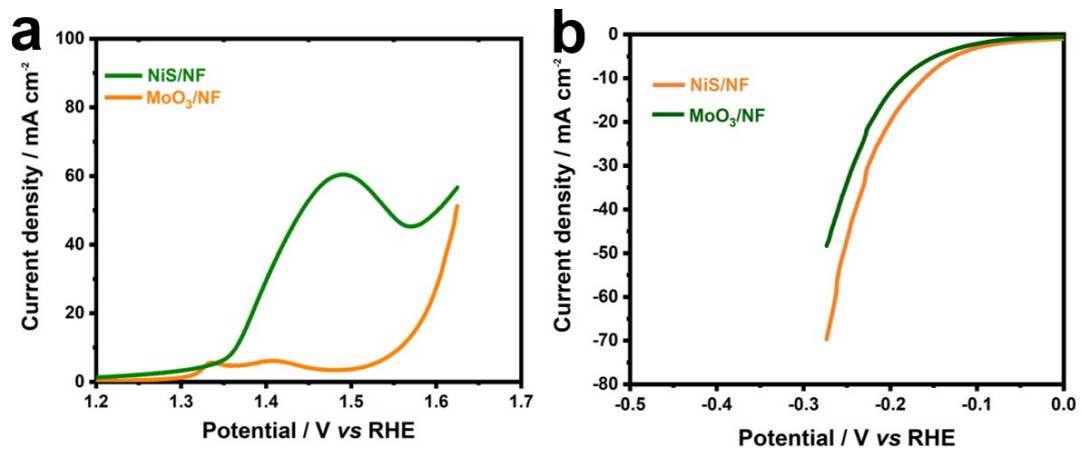

Fig. S5 The linear sweep voltammetry (LSV) curves of NiS/NF and MoO<sub>3</sub>/NF for OER (a) and HER (b) in the alkaline electrolyte of 1.0 M KOH at a scan rate of 5 mV s<sup>-1</sup>.

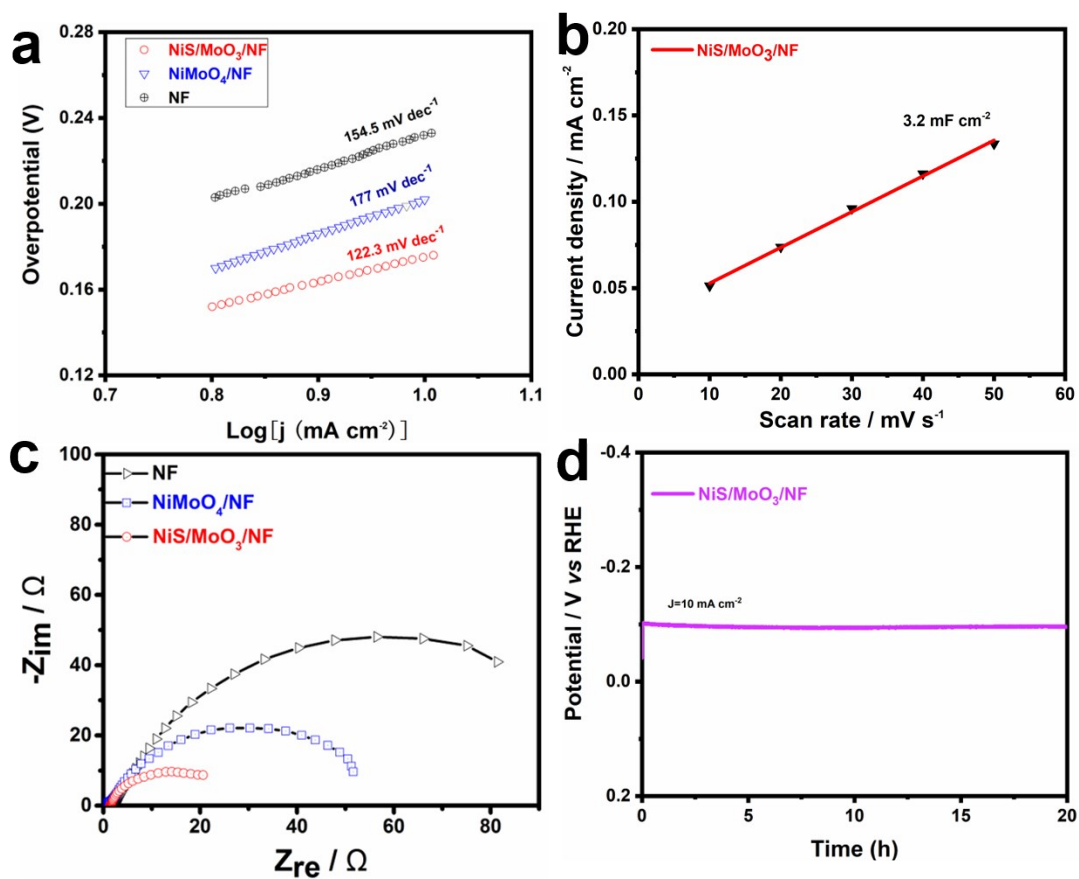

Fig. S6 (a) Tafel plots of as-prepared catalysts. (b) Capacitance current as a function of scan rate. (c) Electrochemical impedance spectroscopy plots. (d) Chronopotentiometry response of NiS/MoO<sub>3</sub>/NF for HER at constant current density of 10 mA cm<sup>-2</sup>

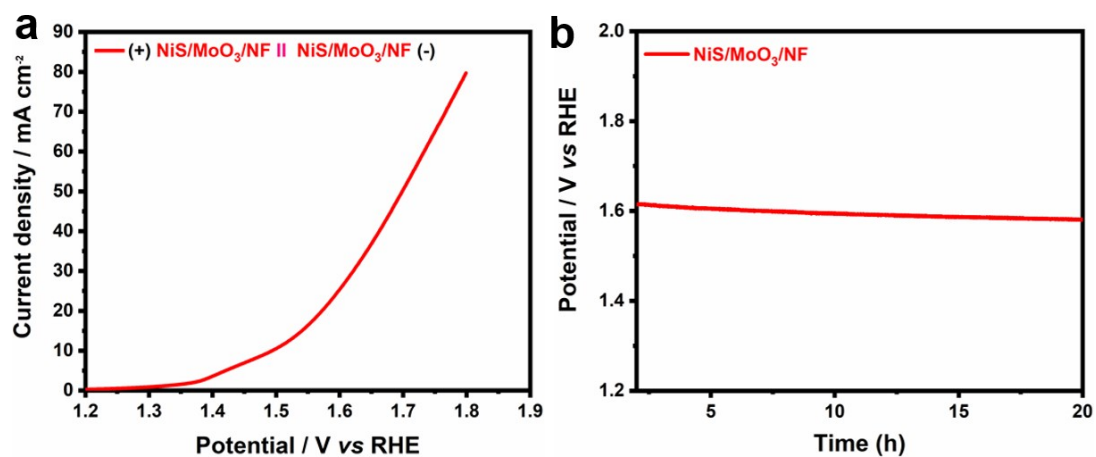

Fig. S7 (a) LSV polarization curve of NiS/MoO<sub>3</sub>/NF towards direct water splitting, (b) Chronopotentiometry curve of NiS/MoO<sub>3</sub>/NF at a current density of 10 mA cm<sup>-2</sup>.

Table S1 Comparison of the OER performance of NiS/MoO<sub>3</sub>/NF with previous reported non-precious OER electrocatalysts in basic electrolyte.

| electrocatalysts                                                  | $\eta_{10}/\eta_{50}$<br>(mV) | Tafel slope<br>(mV dec <sup>-1</sup> ) | electrolyte | Reference |
|-------------------------------------------------------------------|-------------------------------|----------------------------------------|-------------|-----------|
| NiS/MoO <sub>3</sub> /NF                                          | 221                           | 70.9                                   | 1.0 M KOH   | This work |
| Ni <sub>3</sub> S <sub>2</sub> /NF                                | 260                           | -                                      | 1.0 M KOH   | 1         |
| Ni <sub>x</sub> Co <sub>2x</sub> (OH) <sub>6x</sub> @Ni           | 305                           | 78                                     | 1.0 M KOH   | 2         |
| FeOOH/CeO <sub>2</sub> HLNTs-<br>NF                               | 230                           | 92.3                                   | 1.0 M KOH   | 3         |
| Mo-Ni <sub>3</sub> S <sub>2</sub> /Ni <sub>x</sub> P <sub>y</sub> | 238                           | 60.6                                   | 1.0 M KOH   | 4         |
| CoCr LDH nanosheets                                               | 340                           | 81                                     | 1.0 M KOH   | 5         |
| NiS/NF                                                            | 335                           | 89                                     | 1.0 M KOH   | 6         |

Table S2 Comparison of the cell voltage for overall water splitting of NiS/MoO<sub>3</sub>/NF with previous reported non-precious electrocatalysts at 10 mA cm<sup>-2</sup> water splitting current density in basic electrolyte.

| electrocatalysts                              | Cell voltage (V) | electrolyte | Reference |
|-----------------------------------------------|------------------|-------------|-----------|
| NiS/MoO <sub>3</sub> /NF                      | 1.566            | 1.0 M KOH   | This work |
| Ni <sub>3</sub> S <sub>2</sub> /NF            | 1.64             | 1.0 M KOH   | 6         |
| Ni <sub>3</sub> Se <sub>2</sub> nanoforest/NF | 1.61             | 1.0 M KOH   | 7         |
| Ni <sub>2.5</sub> Co <sub>0.5</sub> Fe/NF     | 1.62             | 1.0 M KOH   | 8         |
| Ni <sub>x</sub> P <sub>y</sub> -325           | 1.57             | 1.0 M KOH   | 8         |
| Ni/NiP                                        | 1.61             | 1.0 M KOH   | 9         |
| Ni-P foam                                     | 1.64             | 1.0 M KOH   | 10        |

## Reference

[1] L. Feng, G. Yu, Y. Wu, G. Li, H. Li, Y. Sun, T. Asefa, W. Chen, X. Zhou, J. Am. Chem. Soc. 2015, 137, 14023-14026.

- [2] Z. Liu, G. Chen, P. Zhou, N. Li, Y. Su, *J. Power Sources* 2016, 317, 1-9.
- [3] J. Feng, S. Ye, H. Xu, Y. Tong, G. Li, *Adv. Mater.* 2016, 28, 4698-4703.
- [4] X. Luo, P. Ji, P. Wang, R. Cheng, D. Chen, C. Lin, J. Zhang, J. He, Z. Shi, N. Li, S. Xiao, and S. Mu, *Adv. Energy Mater.* 2020, 1903891.
- [5] C. Dong, X. Yuan, X. Wang, X. Liu, W. Dong, R. Wang, Y. Duan, F. Huang, *J. Mater. Chem. A*, 2016,4, 11292-11298.
- [6] W. Zhu, X. Yue, W. Zhang, S. Yu, Y. Zhang, J. Wang, J. Wang, *Chem. Commun.* 2016, 52, 1486--1489.
- [7] R. Xu, R. Wu, Y. Shi, J. Zhang, B. Zhang, *Nano Energy* 2016, 24, 103-110.
- [8] X. Zhu, C. Tang, H. Wang, B. Li, Q. Zhang, C. Li, C. Yang, F. Wei, 2016, 4, 7245-7250.
- [9] G. Chen, T. Ma, Z. Liu, N. Li, Y. Su, K. Davey, S. Qiao, *Adv. Funct. Mater.* 2016, 26, 3314-3323.
- [10] X. Wang, W. Li, D. Xiong, L. Liu, *J. Mater. Chem. A* 2016, 4, 5639-5646.
